# Supplementary material for: Prevalence and Antimicrobial Resistance Diversity of Salmonella Isolates in Jiaxing City, China
Source: MDPI journal article supplement (doi:10.3390/antibiotics13050443), 2024-05-14
Supplement: s1 [file s1]

Table S3. Resistant genes carried in all, *S. Typhimurium*, and *S. Typhimurium* monophasic variant isolates

| Resistant gene                  | All isolates<br>(n=215) |       | <i>S. Typhimurium</i><br>(n=25) |       | <i>S. Typhimurium</i> monophasic variant<br>(n=84) |        |
|---------------------------------|-------------------------|-------|---------------------------------|-------|----------------------------------------------------|--------|
| <i>bla</i> <sub>TEM-1B</sub>    | 128                     | 59.5% | 19                              | 76.0% | 63                                                 | 75.0%  |
| <i>floR</i>                     | 92                      | 42.8% | 13                              | 52.0% | 42                                                 | 50.0%  |
| <i>sul2</i>                     | 90                      | 41.9% | 14                              | 56.0% | 44                                                 | 52.4%  |
| <i>qnrS1</i>                    | 81                      | 37.7% | 12                              | 48.0% | 44                                                 | 52.4%  |
| <i>aph(6)-Id</i>                | 65                      | 30.2% | 4                               | 16.0% | 37                                                 | 44.1%  |
| <i>aph(3'')-Ib</i>              | 65                      | 30.2% | 5                               | 20.0% | 39                                                 | 46.4%  |
| <i>tet(A)</i>                   | 58                      | 27.0% | 15                              | 60.0% | 7                                                  | 8.3%   |
| <i>*tet(B)</i>                  | 52                      | 24.2% | 0                               | 0     | 52                                                 | 61.9%  |
| <i>sul1</i>                     | 41                      | 19.1% | 1                               | 4.0%  | 19                                                 | 22.6%  |
| <i>aph(3')-Ia</i>               | 37                      | 17.2% | 1                               | 4.0%  | 21                                                 | 25.0%  |
| <i>cmlA1</i>                    | 34                      | 15.8% | 9                               | 36.0% | 14                                                 | 16.7%  |
| <i>aadA1</i>                    | 32                      | 14.9% | 9                               | 36.0% | 9                                                  | 10.7%  |
| <i>sul3</i>                     | 31                      | 14.4% | 9                               | 36.0% | 5                                                  | 6.0%   |
| <i>dfrA12</i>                   | 25                      | 11.6% | 9                               | 36.0% | 1                                                  | 1.2%   |
| <i>ARR-3</i>                    | 25                      | 11.6% | 1                               | 4.0%  | 16                                                 | 19.1%  |
| <i>aph(4)-Ia</i>                | 25                      | 11.6% | 0                               | 0     | 18                                                 | 21.43% |
| <i>aac(6')-Ib-cr</i>            | 24                      | 11.2% | 1                               | 4.0%  | 14                                                 | 16.67% |
| <i>aac(3)-IV</i>                | 24                      | 11.2% | 0                               | 0     | 17                                                 | 20.24% |
| <i>tet(M)</i>                   | 23                      | 10.7% | 13                              | 52.0% | 2                                                  | 2.38%  |
| <i>*lmu(F)</i>                  | 23                      | 10.7% | 0                               | 0     | 18                                                 | 21.43% |
| <i>*bla</i> <sub>OXA-10</sub>   | 23                      | 10.7% | 0                               | 0     | 19                                                 | 22.62% |
| <i>*dfrA14</i>                  | 21                      | 9.8%  | 0                               | 0     | 14                                                 | 16.67% |
| <i>*bla</i> <sub>CTX-M-65</sub> | 21                      | 9.8%  | 0                               | 0     | 16                                                 | 19.05% |
| <i>*ARR-2</i>                   | 21                      | 9.8%  | 0                               | 0     | 15                                                 | 17.86% |
| <i>aadA2</i>                    | 21                      | 9.8%  | 9                               | 36.0% | 1                                                  | 1.19%  |
| <i>*dfrA27</i>                  | 20                      | 9.3%  | 0                               | 0     | 14                                                 | 16.67% |
| <i>*aadA16</i>                  | 20                      | 9.3%  | 0                               | 0     | 15                                                 | 17.86% |
| <i>aac(3)-IIId</i>              | 18                      | 8.4%  | 1                               | 4.0%  | 3                                                  | 3.57%  |
| <i>bla</i> <sub>CTX-M-55</sub>  | 12                      | 5.6%  | 1                               | 4.0%  | 6                                                  | 7.14%  |
| <i>mph(A)</i>                   | 10                      | 4.7%  | 2                               | 8.0%  | 0                                                  | 0      |
| <i>bleO</i>                     | 9                       | 4.2%  | 4                               | 16.0% | 4                                                  | 4.76%  |
| <i>qnrB6</i>                    | 8                       | 3.7%  | 0                               | 0     | 3                                                  | 3.57%  |
| <i>fosA7</i>                    | 8                       | 3.7%  | 0                               | 0     | 0                                                  | 0      |
| <i>catB3</i>                    | 6                       | 2.8%  | 1                               | 4.0%  | 2                                                  | 2.38%  |
| <i>aadA2b</i>                   | 6                       | 2.8%  | 0                               | 0     | 4                                                  | 4.76%  |
| <i>bla</i> <sub>OXA-1</sub>     | 5                       | 2.3%  | 1                               | 4.0%  | 2                                                  | 2.38%  |
| <i>cml</i>                      | 4                       | 1.9%  | 0                               | 0     | 0                                                  | 0      |
| <i>catA2</i>                    | 4                       | 1.9%  | 0                               | 0     | 1                                                  | 1.19%  |
| <i>bla</i> <sub>CTX-M-14b</sub> | 4                       | 1.9%  | 0                               | 0     | 0                                                  | 0      |
| <i>aadA22</i>                   | 4                       | 1.9%  | 1                               | 4.0%  | 2                                                  | 2.38%  |
| <i>qnrS2</i>                    | 3                       | 1.4%  | 0                               | 0     | 1                                                  | 1.19%  |

|                                |   |      |   |      |   |       |
|--------------------------------|---|------|---|------|---|-------|
| <i>bla</i> <sub>CTX-M-14</sub> | 3 | 1.4% | 1 | 4.0% | 2 | 2.38% |
| <i>aadA8b</i>                  | 3 | 1.4% | 0 | 0    | 0 | 0     |
| <i>aadA7</i>                   | 3 | 1.4% | 0 | 0    | 0 | 0     |
| <i>aadA17</i>                  | 3 | 1.4% | 0 | 0    | 1 | 1.19% |
| <i>aac(3)-Id</i>               | 3 | 1.4% | 0 | 0    | 0 | 0     |
| <i>qnrB4</i>                   | 2 | 0.9% | 1 | 4.0% | 0 | 0     |
| <i>qacE</i>                    | 2 | 0.9% | 0 | 0    | 1 | 1.19% |
| <i>msr(E)</i>                  | 2 | 0.9% | 0 | 0    | 0 | 0     |
| <i>mph(E)</i>                  | 2 | 0.9% | 0 | 0    | 0 | 0     |
| <i>fosA3</i>                   | 2 | 0.9% | 0 | 0    | 2 | 2.38% |
| <i>erm(B)</i>                  | 2 | 0.9% | 1 | 4.0% | 0 | 0     |
| <i>dfrA1</i>                   | 2 | 0.9% | 0 | 0    | 0 | 0     |
| <i>bla</i> <sub>LAP-2</sub>    | 2 | 0.9% | 0 | 0    | 1 | 1.19% |
| <i>bla</i> <sub>CTX-M-24</sub> | 2 | 0.9% | 1 | 4.0% | 1 | 1.19% |
| <i>aph(3')-IIa</i>             | 2 | 0.9% | 0 | 0    | 0 | 0     |
| <i>tet(G)</i>                  | 1 | 0.5% | 0 | 0    | 0 | 0     |
| <i>tet(D)</i>                  | 1 | 0.5% | 0 | 0    | 1 | 1.19% |
| <i>rmtB</i>                    | 1 | 0.5% | 1 | 4.0% | 0 | 0     |
| <i>qnrB19</i>                  | 1 | 0.5% | 0 | 0    | 0 | 0     |
| <i>OqxB</i>                    | 1 | 0.5% | 0 | 0    | 1 | 1.19% |
| <i>OqxA</i>                    | 1 | 0.5% | 0 | 0    | 1 | 1.19% |
| <i>mcr-1.1</i>                 | 1 | 0.5% | 0 | 0    | 1 | 1.19% |
| <i>dfrA17</i>                  | 1 | 0.5% | 0 | 0    | 0 | 0     |
| <i>bla</i> <sub>TEM-1A</sub>   | 1 | 0.5% | 0 | 0    | 0 | 0     |
| <i>bla</i> <sub>OXA-16</sub>   | 1 | 0.5% | 0 | 0    | 1 | 1.19% |
| <i>bla</i> <sub>DHA-1</sub>    | 1 | 0.5% | 0 | 0    | 0 | 0     |
| <i>bla</i> <sub>CARB-2</sub>   | 1 | 0.5% | 0 | 0    | 0 | 0     |
| <i>aadA5</i>                   | 1 | 0.5% | 0 | 0    | 0 | 0     |
| <i>aadA3</i>                   | 1 | 0.5% | 0 | 0    | 0 | 0     |
| <i>aac(6')-Iaa</i>             | 1 | 0.5% | 0 | 0    | 0 | 0     |

---
